# Supplementary material for: Nutritionally Improved Wheat Bread Supplemented with Quinoa Flour of Large, Medium and Small Particle Sizes at Typical Doses
Source: MDPI journal article supplement (doi:10.3390/plants12040698), 2023-02-04
Supplement: s1 [file s1]

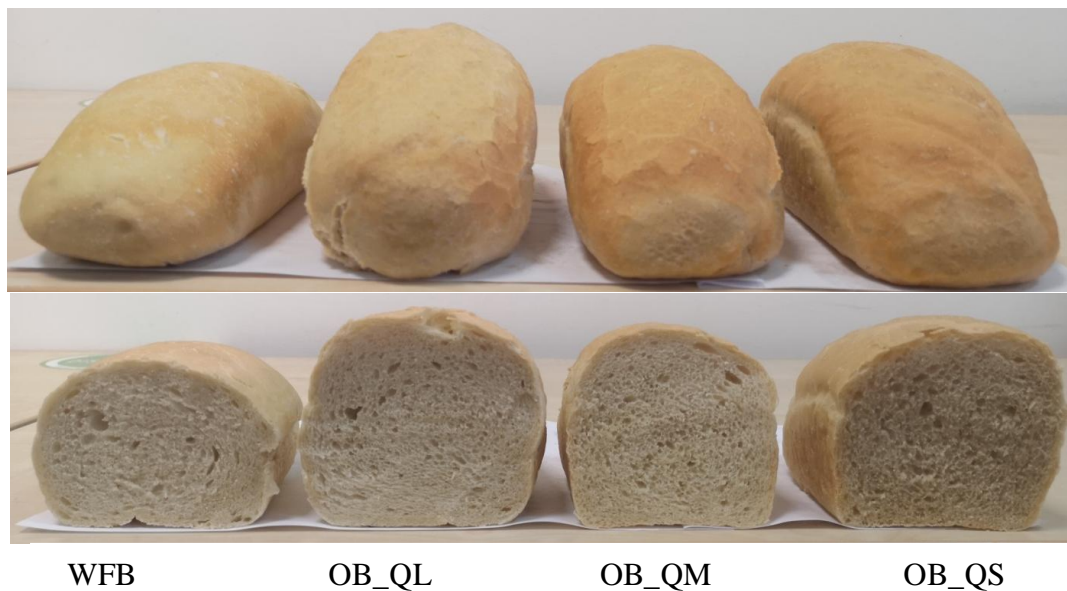

**Figure S1.** The appearance and section of the bread with the optimal dose of quinoa flour corresponding to the large, medium, and small particle size (OB\_QL, OB\_QM, and OB\_QS) compared to wheat flour bread (WFB).
